# Supplementary material
Source: HighWire-hosted journal article supplement (https://thorax.bmj.com/highwire/filestream/173758/field_highwire_adjunct_files/0/618663Online_supplement.pdf)
Supplement: 618663Online_supplement.pdf [file 618663Online_supplement.pdf]

## Online Supplement

Activities during 1994-2004 of the Finnish asthma programme. Some activities would have taken place even without the programme, but it facilitated their implementation.

| Activity type                  | Activities                                                                                                                                                                                                                                                                                                                                                                                                                                                                                                                                                                                       |
|--------------------------------|--------------------------------------------------------------------------------------------------------------------------------------------------------------------------------------------------------------------------------------------------------------------------------------------------------------------------------------------------------------------------------------------------------------------------------------------------------------------------------------------------------------------------------------------------------------------------------------------------|
| Legislation                    | <ul style="list-style-type: none"> <li>Revised anti-smoking legislation 1995 (smoking forbidden in many public places), 2000 (restricted smoking in restaurants, smoke classified as a carcinogen)</li> <li>Outdoor (1996), indoor (1997) air regulations, Ministry of Social Affairs and Health</li> <li>Modified drug reimbursement regulations (6-month obligatory follow-up for new asthmatics)</li> </ul>                                                                                                                                                                                   |
| Leadership, guidance, advocacy | <ul style="list-style-type: none"> <li>National Asthma Follow-up Group (1994-1998)</li> <li>Base organisation: The Finnish Lung Health Association (Filha)</li> <li>Nomination of regional asthma contact specialists</li> </ul>                                                                                                                                                                                                                                                                                                                                                                 |
| Capacity building              | <ul style="list-style-type: none"> <li>Further training; national, regional, local</li> <li>Forums: <ul style="list-style-type: none"> <li>National asthma forum annually every other year since 1993</li> <li>Research forums 1998, 2000, 2002</li> <li>National respiratory care forum, 1996–2004 (7 occasions)</li> <li>Asthma contact-person forums (2 occasions)</li> </ul> </li> <li>Development of medical training material (e.g., textbooks in Finnish: <i>Pulmonary medicine</i> (1997, revised 2000, 2005), <i>Allergology</i> (1999, revised 2006), <i>Asthma</i> (2000))</li> </ul> |
| Networking                     | <ul style="list-style-type: none"> <li>Local asthma contact persons (n = 913; 28% physicians)</li> <li>Asthma pharmacy contact persons (n = 695)</li> <li>Professional and public health organisations (n = 20)</li> </ul>                                                                                                                                                                                                                                                                                                                                                                       |
| Materials, information         | <ul style="list-style-type: none"> <li>Asthma programme 1994-2004</li> <li>Asthma education material, guided self-management training packages</li> </ul>                                                                                                                                                                                                                                                                                                                                                                                                                                        |

|                                     |                                                                                                                                                                                                                                                                                                                                                                                                                                                                                                                                 |
|-------------------------------------|---------------------------------------------------------------------------------------------------------------------------------------------------------------------------------------------------------------------------------------------------------------------------------------------------------------------------------------------------------------------------------------------------------------------------------------------------------------------------------------------------------------------------------|
|                                     | <ul style="list-style-type: none"> <li>• Asthma Week; information for general public annually (by pharmacies and patient organisations)</li> <li>• Public guidance by phone since 1994; Allergy and Asthma Federation, Pulmonary Association HELI</li> </ul>                                                                                                                                                                                                                                                                    |
| Improving diagnostics and treatment | <ul style="list-style-type: none"> <li>• Regional action plans and treatment (referral) chains (internet version or paper)</li> <li>• Evidence-based treatment guidelines 2000, revision 2006</li> <li>• Guided self-management programme</li> <li>• Pharmacy programme 1997</li> <li>• Allergy treatment consensus report 1998</li> <li>• Guidelines for measurement of spirometry and peak-flow since 1995</li> <li>• Early diagnosis and spirometry campaign 2002</li> <li>• Childhood asthma mini-programme 2002</li> </ul> |
| Feedback                            | <ul style="list-style-type: none"> <li>• Follow-up report 1998, Ministry of Social Affairs and Health</li> <li>• Yearly follow-up report on institutional care (National Research and Development Centre for Welfare and Health, Stakes)</li> <li>• Tailor-made local follow-up reports since 2000</li> <li>• Specific reports and publications</li> <li>• Presentations in international and domestic conferences</li> </ul>                                                                                                   |
